# Supplementary material for: Gate-tunable spin waves in antiferromagnetic atomic bilayers
Source: Springer Nature journal article supplement (doi:10.1038/s41563-020-0713-9), 2020-06-22
Supplement: 41563_2020_713_MOESM1_ESM.pdf [file 41563_2020_713_MOESM1_ESM.pdf]

In the format provided by the authors and unedited.

# Gate-tunable spin waves in antiferromagnetic atomic bilayers

Xiao-Xiao Zhang <sup>1,2</sup>, Lizhong Li<sup>3</sup>, Daniel Weber <sup>4</sup>, Joshua Goldberger <sup>4</sup>, Kin Fai Mak <sup>1,3,5</sup>  and Jie Shan <sup>1,3,5</sup> 

---

<sup>1</sup>Kavli Institute at Cornell for Nanoscale Science, Ithaca, NY, USA. <sup>2</sup>Department of Physics, University of Florida, Gainesville, FL, USA. <sup>3</sup>School of Applied and Engineering Physics, Cornell University, Ithaca, NY, USA. <sup>4</sup>Department of Chemistry and Biochemistry, Ohio State University, Columbus, OH, USA. <sup>5</sup>Laboratory of Atomic and Solid State Physics, Cornell University, Ithaca, NY, USA. e-mail: [kinfai.mak@cornell.edu](mailto:kinfai.mak@cornell.edu); [jie.shan@cornell.edu](mailto:jie.shan@cornell.edu)

**Supplementary data and figures for  
“Gate-tunable spin waves in antiferromagnetic atomic bilayers”**

Xiao-Xiao Zhang, Lizhong Li, Daniel Weber, Joshua Goldberger, Kin Fai Mak, Jie Shan

<sup>1</sup>Kavli Institute at Cornell for Nanoscale Science, Ithaca, New York, USA

<sup>2</sup>Department of Physics, University of Florida, Gainesville, Florida, USA

<sup>3</sup>School of Applied and Engineering Physics, Cornell University, Ithaca, New York, USA

<sup>4</sup>Department of Chemistry and Biochemistry, Ohio State University, Columbus, Ohio, USA

<sup>5</sup>Laboratory of Atomic and Solid State Physics, Cornell University, Ithaca, New York, USA

Email: [kinfai.mak@cornell.edu](mailto:kinfai.mak@cornell.edu); [jie.shan@cornell.edu](mailto:jie.shan@cornell.edu)

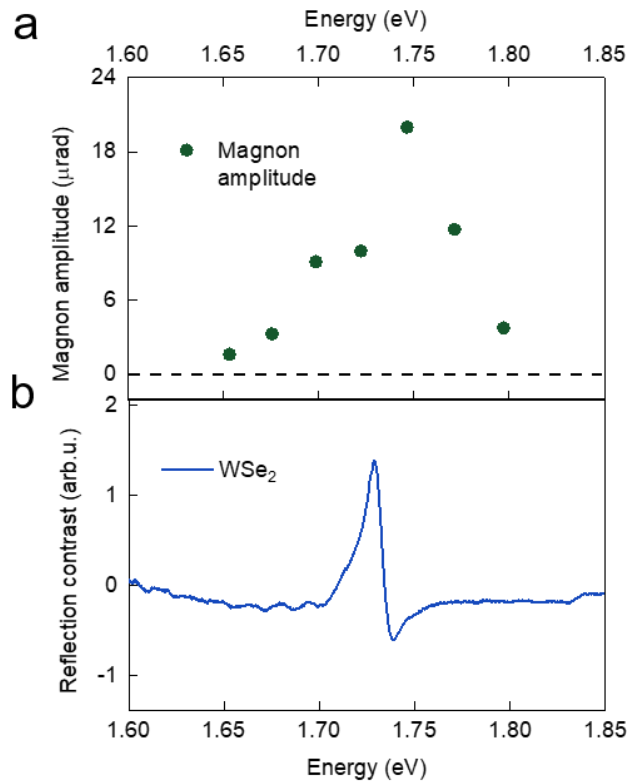

**Figure S1 | Pump energy dependence of magnon amplitude.** **a**, Amplitude of the high-energy spin waves under a fixed in-plane magnetic field of 2 T as a function of pump photon energy. **b**, Reflection contrast spectrum of  $\text{WSe}_2$  on  $\text{CrI}_3$ . The spectrum is modified due to the local field factor in the device structure. The pump-energy dependence of the magnon amplitude resembles that of the excitonic resonance in monolayer  $\text{WSe}_2$ . The spectral broadening may arise from the additional  $\text{WSe}_2$  trion absorption and bandwidth of the light pulses ( $\sim 5$  nm in full width at half maximum (FWHM)) employed in the pump-probe measurement.

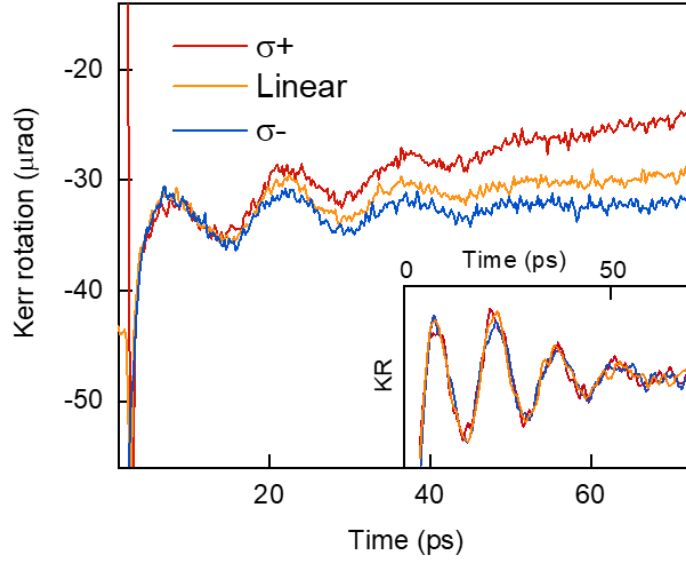

**Figure S2 | Pump polarization dependence of the spin-wave dynamics.** Time-resolved magnetic circular dichroism (MOKE) in bilayer CrI<sub>3</sub> under an in-plane field of 2 T excited by left circularly polarized (red), linear polarized (orange), and right circularly polarized pump (blue). The curves were vertically shifted for easy comparison. Inset: amplitude of the oscillations (after subtraction of the demagnetization dynamics) does not depend on the pump polarization (i.e. photon angular momentum).

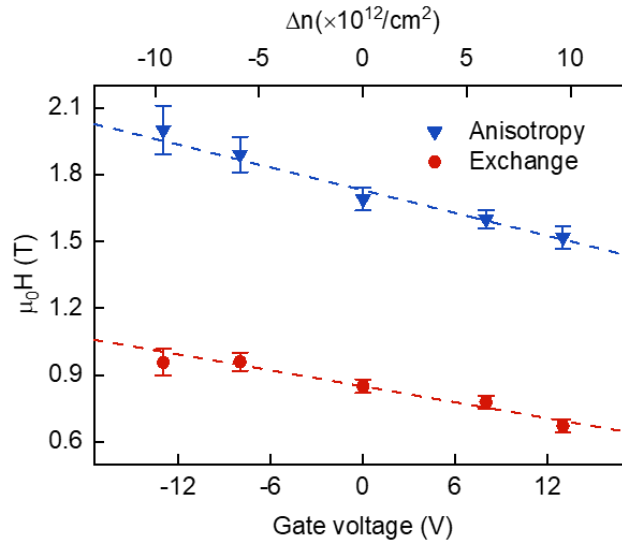

**Figure S3 | Gate-tunable magnetic interactions.** Magnetic anisotropy (blue) and interlayer exchange fields (red) in bilayer CrI<sub>3</sub> as a function of gate voltage (bottom axis) and gate-induced doping density (top axis). Symbols are experiment. Error bars are the standard deviation from the Landau-Lifshitz-Gilbert (LLG) equation analysis shown in Fig. 4b. Dashed lines are linear fits.

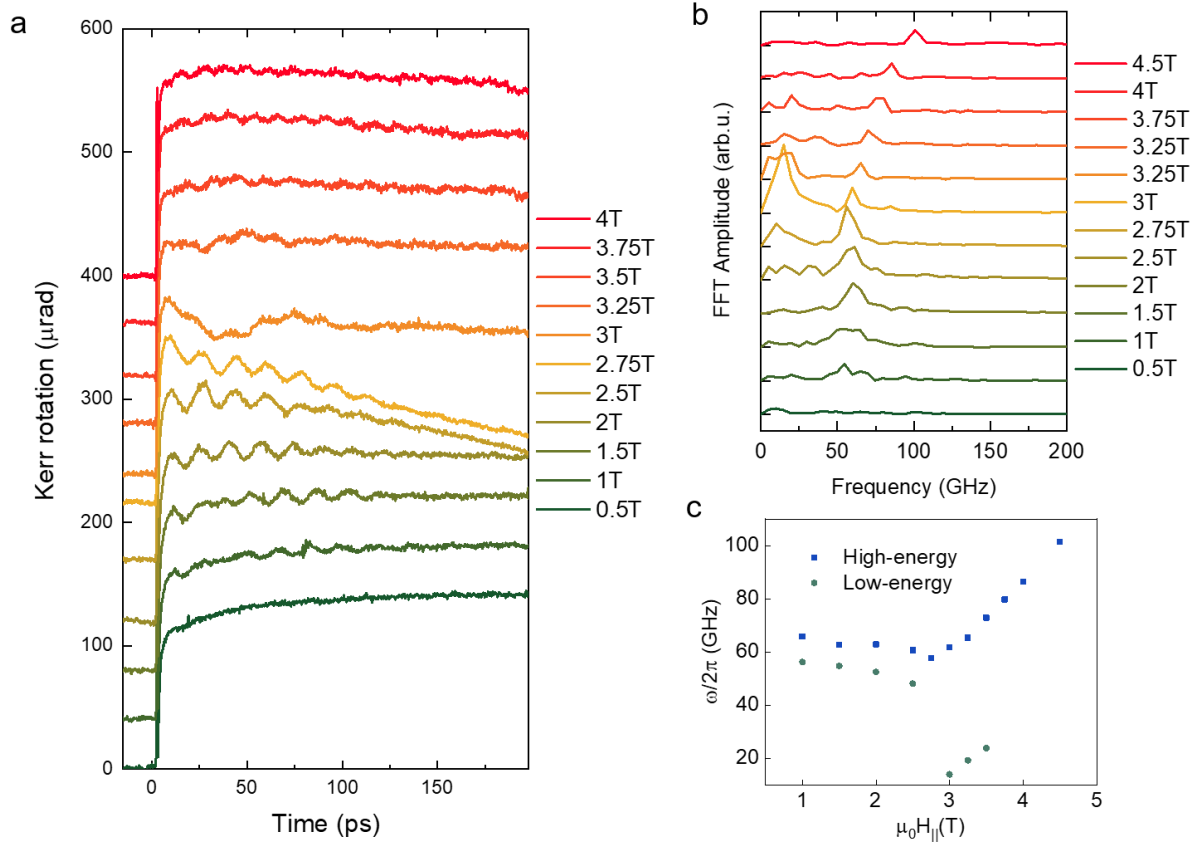

**Figure S4 | Magnon oscillations at 25 K.** **a**, Spin dynamics in bilayer CrI<sub>3</sub> under different in-plane magnetic fields. The curves are vertically displaced for clarity. **b**, Fast Fourier transform (FFT) amplitude spectra of **a**. **c**, In-plane field dispersion of the two magnon modes extracted from fitting the time-resolved MOKE signal with two harmonic oscillations.

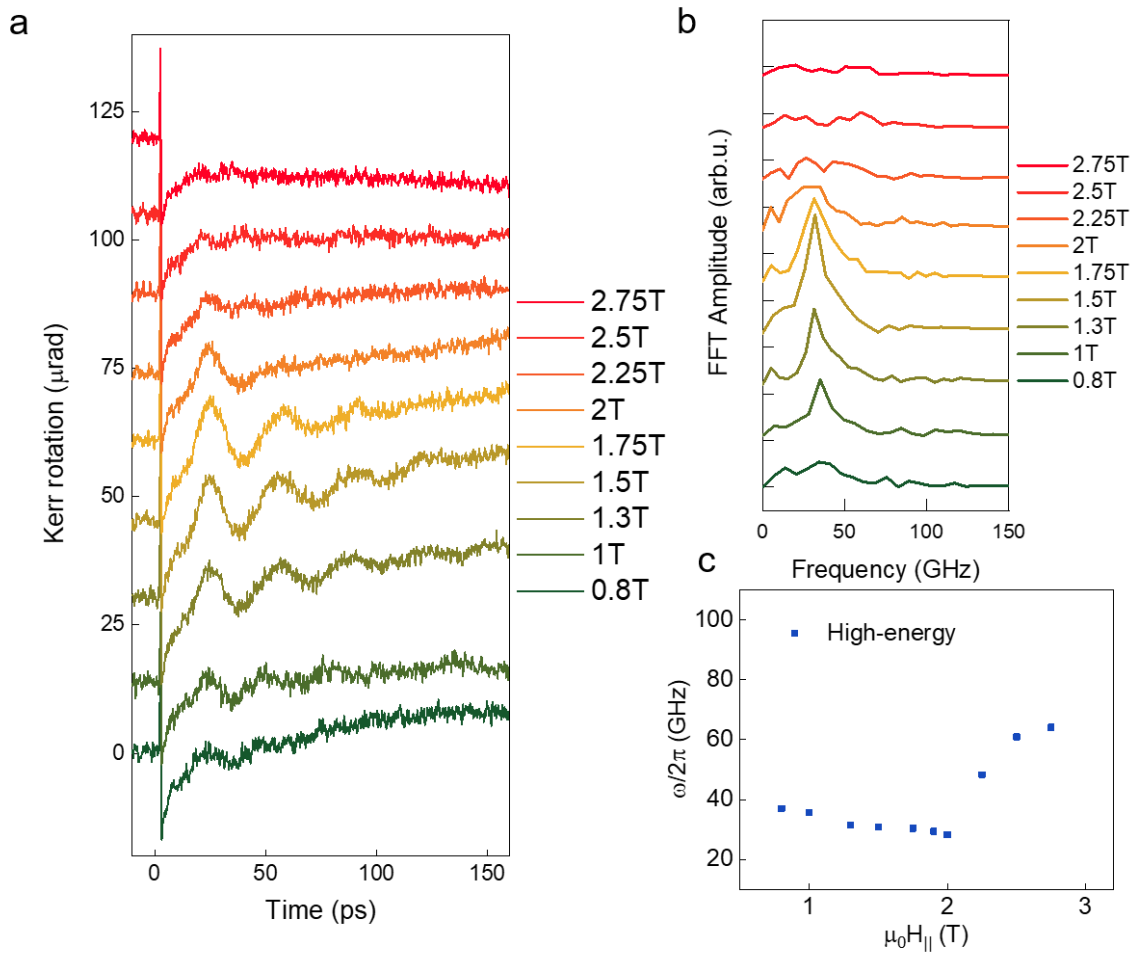

**Figure S5 | Magnon oscillations at 45 K.** Same as in Supplementary Fig. S4. Due to the weak signal, we can only identify the high-energy mode.

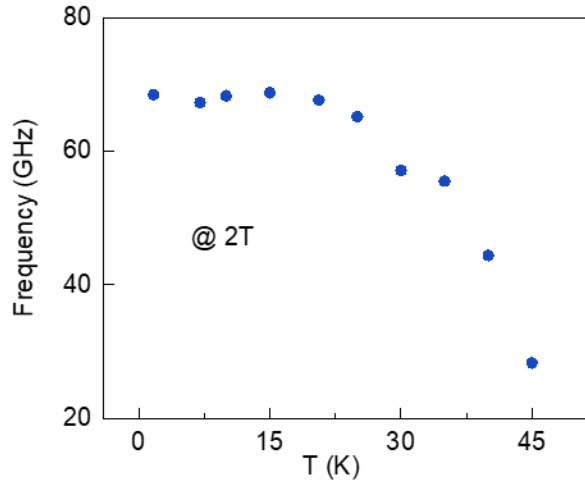

**Figure S6** | Temperature dependence of the high-energy magnon mode under a fixed in-plane magnetic field of 2 T. All other experimental conditions are the same as in Fig. S4 and S5.

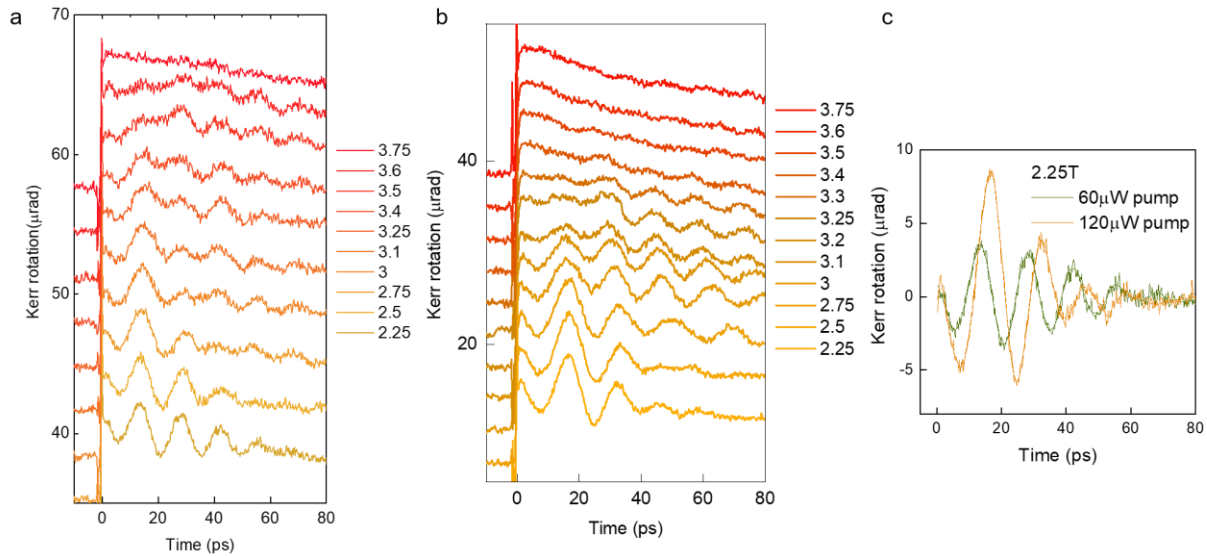

**Figure S7** | **Magnetic oscillations at different pump power.** **a,b**, Time-resolved MOKE excited by pump power of  $60 \mu\text{W}$  (**a**) and  $120 \mu\text{W}$  (**b**) at 1.7 K. Measurements were performed under the same conditions. **c**, Direct comparison of oscillation traces under 2.25 T for the two pump powers. The amplitude of oscillations is proportional to the pump power. Frequency red shifts at higher pump power. The frequency shift can arise from a combined effect of elevated sample temperature and higher photo doping.

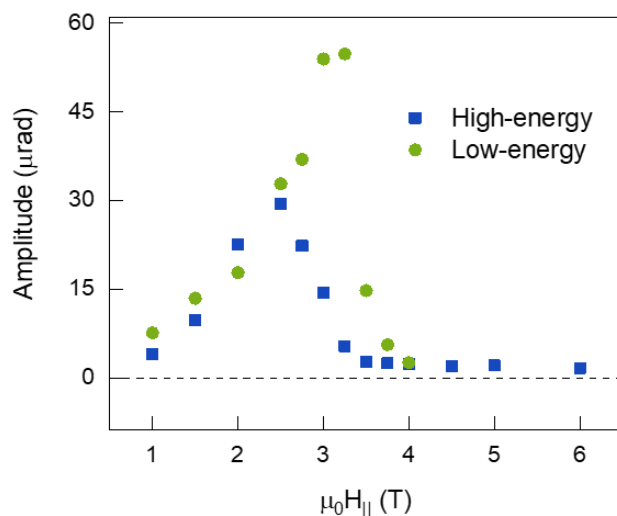

**Figure S8** | Amplitude of the high-energy and low-energy modes extracted from the time-resolved MOKE (Fig. 2 of the main text).

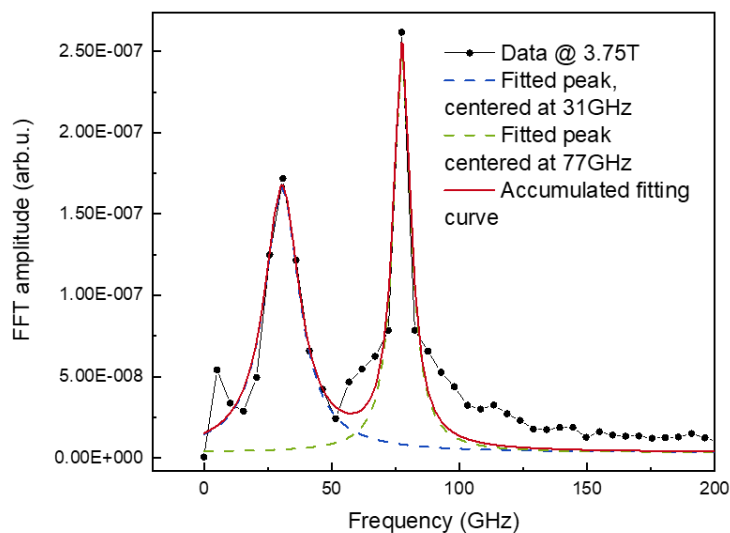

**Figure S9** | FFT amplitude for the magnetic oscillations under an in-plane magnetic field of 3.75 T (symbols). The black line is a guide to the eye. The red line is the fit that includes two Voigt functions (dashed blue and green lines).

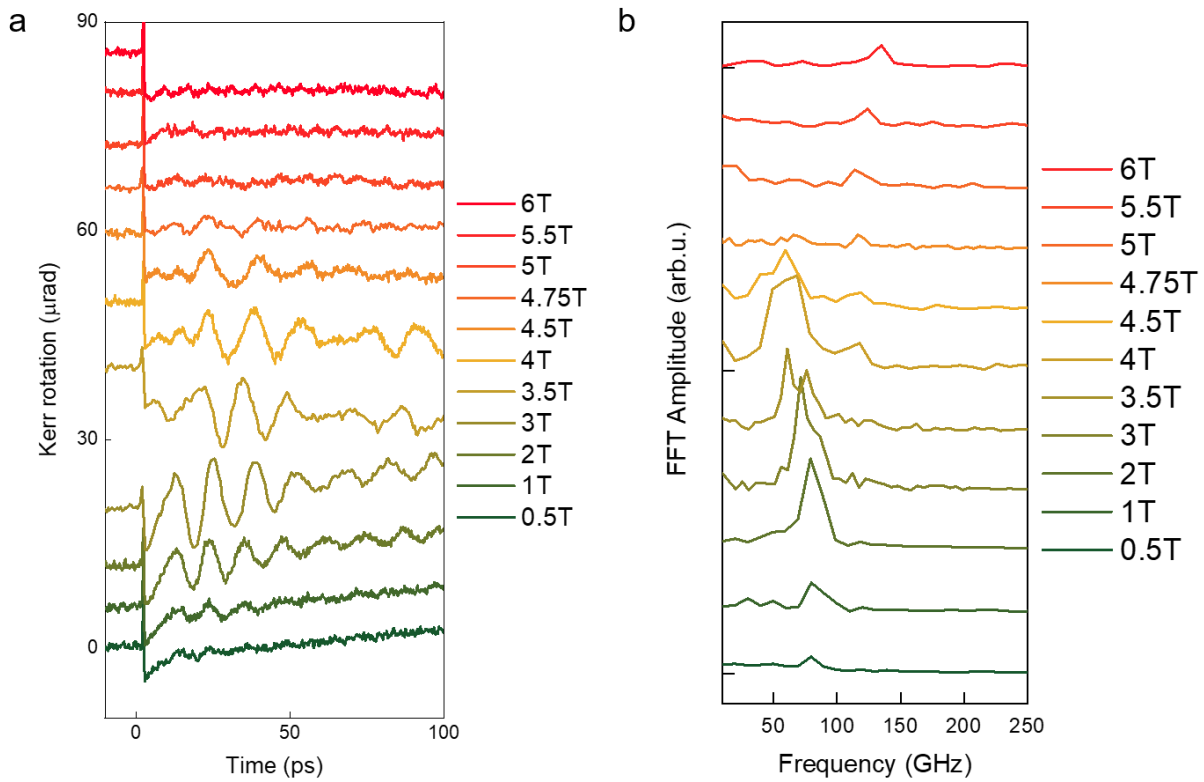

**Figure S10 | Spin-wave dynamics in few-layer CrI<sub>3</sub> at 1.7 K. a,** Time-resolved MOKE under different in-plane magnetic fields. **b,** FFT amplitude spectrum of **a**. The damping at 6 T is estimated to be  $\sim 0.04$ , which is similar to that in bilayer CrI<sub>3</sub>.



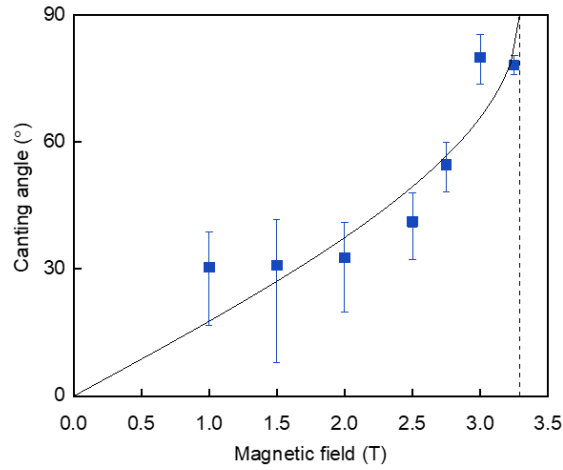

**Figure S11 | Spin canting angle.** Spin canting angle (with respect to the anisotropy axis) as a function of applied in-plane magnetic field. Symbols are evaluated from the mode frequencies of Fig. 3c and solid line represents  $\theta = \sin^{-1} \left( \frac{H_{\parallel}}{H_S} \right)$  with  $H_S \approx 3.3$  T. The dashed line marks the in-plane saturation field of  $\sim 3.3$ T.

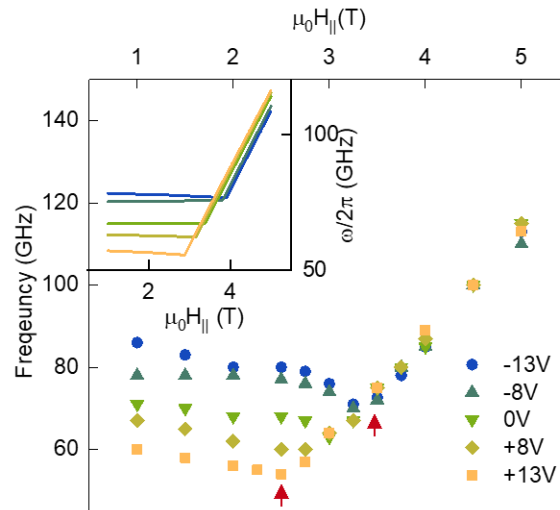

**Figure S12 | Magnetic dispersion of spin-wave frequency at different gate voltages.** The high-energy mode frequency are extracted as a function of magnetic field for the gate voltages measured in Fig. 4(a). The inset shows the corresponding fitting using LLG equations. The red arrows highlight the shift of in-plane saturation field, which is up to  $\sim 1$ T with the applied gate voltage.
